# Supplementary material for: Improved synthesis of dithieno[3,2-b:2′,3′-d]thiophene (DTT) and derivatives for cross coupling
Source: Royal Society of Chemistry journal article supplement (doi:10.1039/b207403f), 2002-01-01
Supplement: b207403f.doc [file b207403f.doc]

# Electronic supplementary information

Improved synthesis of dithieno[3,2-*b*:2',3'-*d*]thiophene (DTT)

and derivatives for cross coupling

Joseph Frey*, Andrew D. Bond and Andrew B. Holmes*

Melville Laboratory for Polymer Synthesis, Department of Chemistry, University of Cambridge, Lensfield Rd, Cambridge CB2 1EW, UK. Fax: 44 1223 334866; Tel: 44 1223 334370;

E-mail: [abh1@cam.ac.uk](mailto:abh1@cam.ac.uk) [jf245@cam.ac.uk](mailto:jf245@cam.ac.uk).

**Supporting information**

**2,6-Dibromodithieno[3,2-*b*:2',3'-*d*]thiophene (2)**

m.p. 162-163 ºC (EtOH); H (250 MHz, CDCl3) 7.26 (2H, s); C (62.5 MHz, CDCl3:CS2) 112.61, 123.23, 130.93, 139.20; *m/z* (EI) 351.7677 (M+. C8H2Br2S3 requires 351.7685). (Found: C, 27.1; H, 0.6. C8H2Br2S3 requires C, 27.1; H, 0.6%).

**3,5-Dibromodithieno[3,2-*b*:2',3'-*d*]thiophene (3)**

m.p. 201 ºC(EtOH); H (250 MHz, CDCl3) 7.29 (2H, s); C(125 MHz, CDCl3:CS2) 103.95, 123.09, 130.70, 142.68; *m/z* (EI) 351.7686 (M+. C8H2Br2S3 requires 351.7685). (Found: C, 27.2, H, 0.6. C8H2Br2S3 requires 27.1; H, 0.6%).

**3,5-Dibromo-2,6-bis(trimethylsilyl)dithieno[3,2-*b*:2',3'-*d*]thiophene (8)**

m.p. 168-169 ºC(EtOH); H (250 MHz, CDCl3) 0.47 (9H, s); C (100 MHz, CDCl3) -0.88, 109.87, 134.16, 136.19, 145.61; *m/z* (EI) 495.8465 (M+. C14H18Br2S3Si2 requires 495.8476).(Found: C, 33.9; H, 3.7. C14H18Br2S3Si2 requires C, 33.7, H, 3.6%).

**2,6-Dibromo-3,5-bis(trimethylsilyl)dithieno[3,2-*b*:2',3'-*d*]thiophene (9)**

m.p. 139 ºC(EtOH); H (250 MHz, CDCl3)0.51 (9H, s);C (100 MHz, CDCl3) -0.29, 118.40, 130.18, 133.82, 144.71; *m/z* (CI, NH3) 496.8553 (M+ + H. C14H19Br2S3Si2 requires 496.8554).(Found: C, 33.7; H, 3.5 C14H18Br2S3Si2 requires C, 33.7, H, 3.6%).

2,6-Bis(3-hexyl-2-thienyl)dithieno[3,2-*b*:2',3'-*d*]thiophene (12)

m.p. 56 ºC (ex MeOH); H (400 MHz, CDCl3)0.89 (6H, t, *J* 7), 1.2-1.5 (12H, m), 1.85 (4H,tt, *J* 8,8), 2.70-2.82 (4H, m), 6.97 (2H, d, *J* 5.0), 7.23 (2H, d, *J* 5.0), 7.30 (*2*H, s);C (100 MHz, CDCl3) 14.08, 22.62, 29.24, 29.28, 30.74, 31.69, 119.26, 119.28, 124.41, 130.09, 130.55, 130.63, 136.93, 140.38, 140.91; *m/z* (EI) 528.1103 (M+. C28H32S5 requires 528.1108).

**Preparation of dithieno[3,2-*b*:2',3'-*d*]thiophene-2,6-dicarboxylic acid diethyl ester (6)**

# To a mixture of ethyl-2-mercaptoacetate (6.06 cm3, 6.48 g, 53.7 mmol) and potassium carbonate (9.65 g, 70 mmol) in dry DMF (50 cm3) was added a solution of 3,4-dibromo-thiophene-2,5-dicarbaldehyde (8 g, 26.85 mmol) (prepared by formylation of tetrabromothiophene first by transmetallation with n-BuLi followed by addition of *N*-formylpiperidine) in dry DMF (100 cm3). The resulting mixture was stirred at room temperature for 3 days under a nitrogen atmosphere. The red reaction mixture was then poured into 400 cm3 of water. An off-white precipitate formed and the suspension was extracted with dichloromethane (3  100 cm3). The combined organic phases were washed with brine (6  100 cm3) to remove the DMF and dried (MgSO4). Upon concentration *in vacuo* a white suspension formed which was filtered on a Buchner funnel. The filtrate was further concentrated to yield more precipitate, which was filtered as well. The combined solids were dried *in vacuo* at room temperature to afford the *title* *compound* (6.53 g, 71%) which was recrystallised from ethanol to give colourless crystals, mp 196 ºC: H (500 MHz, CDCl3) 1.41 (6H, t, *J* 7.0), 4.40 (4H, q, *J* 7.0), 8.02 (2H, s); C (100 MHz, CDCl3) 14.33, 61.70, 126.69, 135.21, 135.83, 143.25, 162.06; max (solid)/ cm-1 743, 855, 1010, 1068, 1224, 1270, 1356, 1370, 1493, 1689, 1710(sh). *m/z* (EI) 339.9901 (M+. C14H12O4S3 requires 339.9898. (Found: C, 49.2, H, 3.5. C14H12O4S3 requires C, 49.4; H, 3.55%).


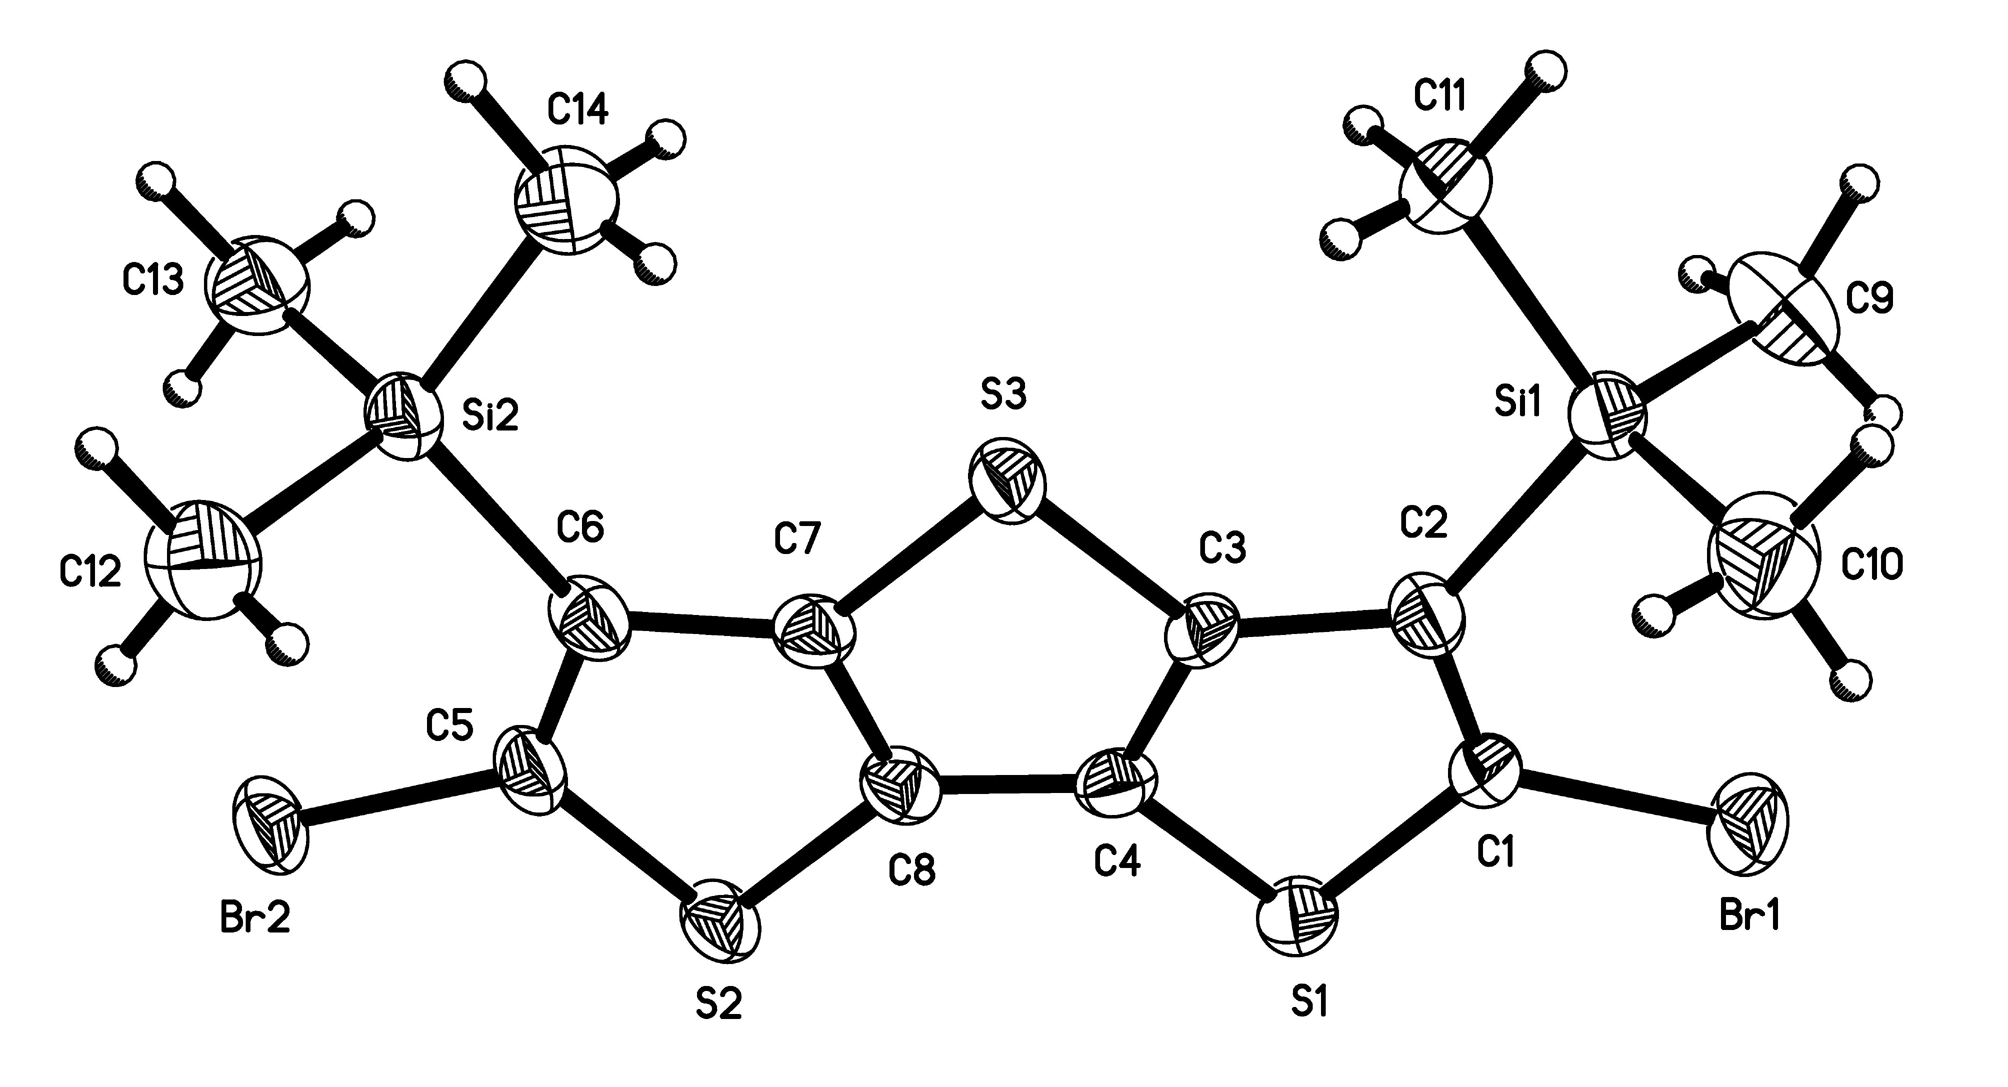


**Fig. S1** Molecular structure of **9** showing displacement ellipsoids at 50% probability for non-H atoms. The ellipsoids of the second symmetry independent molecule are comparable


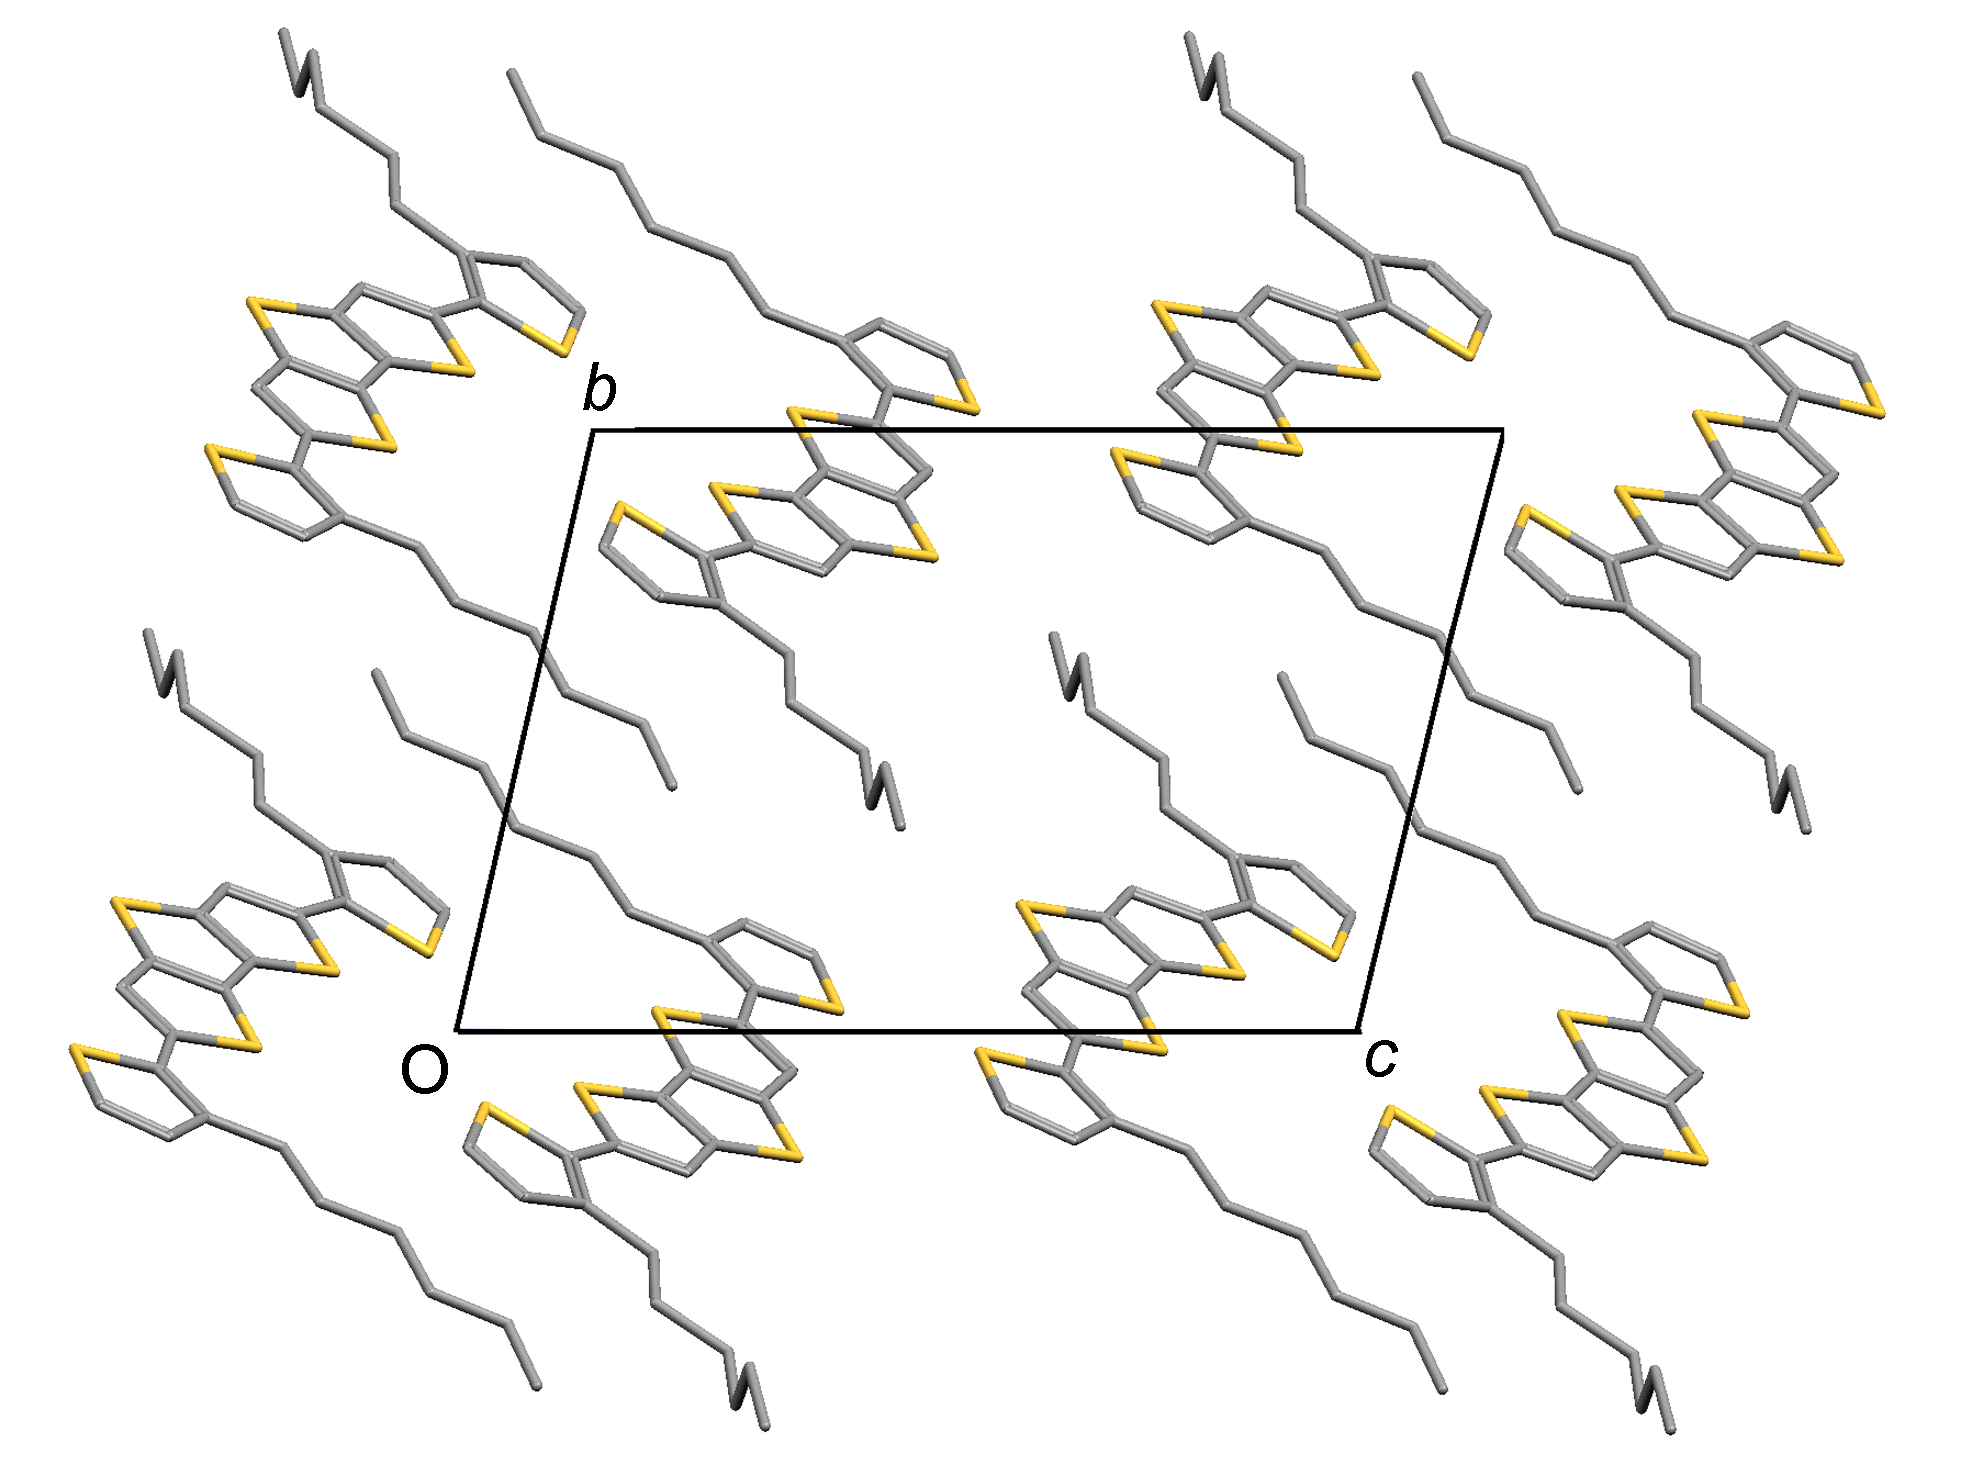


**Fig. S2** Projection of the crystal structure of **12** along the stacking direction of the dimeric units.
